# Supplementary material for: The Role of Heparanase in the Pathogenesis of Acute Pancreatitis: A Potential Therapeutic Target
Source: PubMed Central journal article supplement (PMC5429646; doi:10.1038/s41598-017-00715-6), 2017-04-06

# **The Role of Heparanase in the Pathogenesis of Acute Pancreatitis:**

## **A Potential Therapeutic Target**

Iyad Khamaysi<sup>1#\*</sup>, Preeti Singh<sup>2#</sup>, Susan Nasser<sup>3</sup>, Hoda Awad<sup>3</sup>,

Yehuda Chowers<sup>1</sup>, Edmond Sabo<sup>4</sup>, Edward Hammond<sup>5</sup>, Ian Gralnek<sup>6</sup>, Irena Minkov<sup>4</sup>,

Alessandro Nosedà<sup>7</sup>, Neta Ilan<sup>2</sup>, Israel Vlodaysky<sup>2</sup> and Zaid Abassi<sup>3,8</sup>

### **Supplementary Figure Legend**

**Suppl. Figure 1. A.** Heparanase activity. Pancreas tissue was harvested from control WT mice (Con) or WT mice treated with cerulein in the absence (Cer) or presence of Roneparstat (Cer+SST), and pancreatic tissue extracts were evaluated for heparanase activity as described under 'Materials and Methods'. **B.** Immunostaining. Hpa-Tg mice were injected with saline (left panels) or cerulein in the absence (middle panels) or presence (right panels; +SST) of Roneparstat pretreatment. Pancreas tissues were collected 24 h thereafter, and 5 micron sections from formalin-fixed, paraffin-embedded samples were stained for phospho-STAT3 (upper panels) and p65 (lower panels). **C.** Pancreatic index. Pancreatic tissues were collected from control untreated WT (n=13) or Hpa-Tg mice (saline; n=11) or mice treated with cerulein in the absence (cerulein; n=24) or presence of PG545 (cerulein+PG545; n=20) or SST0001 (Cerulein+SST; n=6) and evaluated for pancreatic index (i.e., pancreatic weight/body weight ratio). \*\*\*p<0.01 for saline vs. cerulein in Hpa-Tg mice; \*p<0.05 in cerulein vs. cerulein+PG545/SST0001 in WT and Hpa-Tg mice. **D.** IL-10 induction. WT and Hpa-Tg mice were injected with saline (Con) or cerulein in the absence (Cer) or presence of PG545 pretreatment (Cer+PG). Pancreas tissues were collected 24 h thereafter, total RNA was extracted and subjected to real-time PCR analyses applying primers specific for IL-10. **E, F.** Secretion of both lipase and amylase is markedly

inhibited by PG545 administered already 2 h prior to cerulein. Hpa-TG mice were pretreated with PG545 (400 µg/mouse; i.p) or saline administered 24 h (TG+Cerulein+PG early) or 2 h (TG+Cerulein+PG late) prior to induction of AP by cerulein. Lipase (**E**) and amylase (**F**) levels were quantified after 24 h. Note reduced levels of lipase and amylase already upon late administration of PG545.

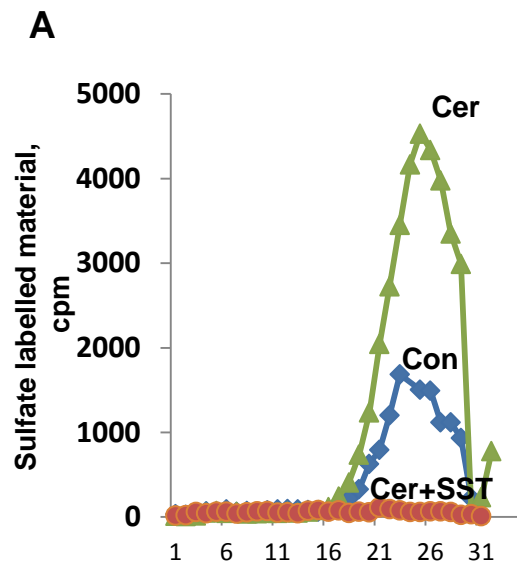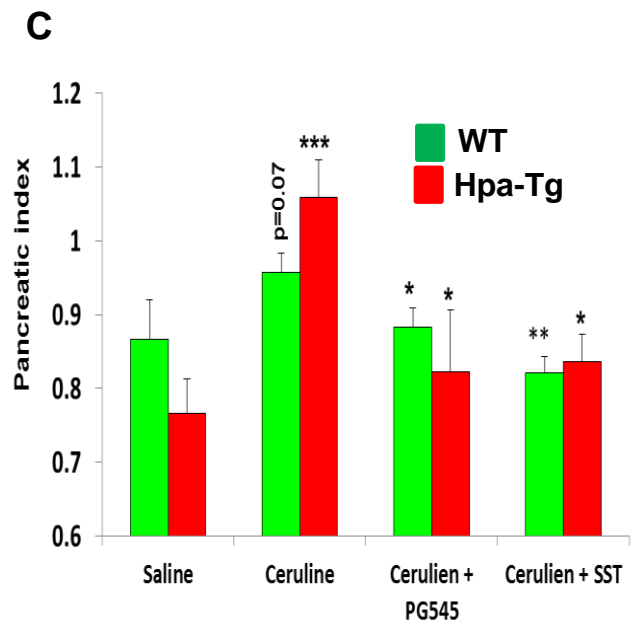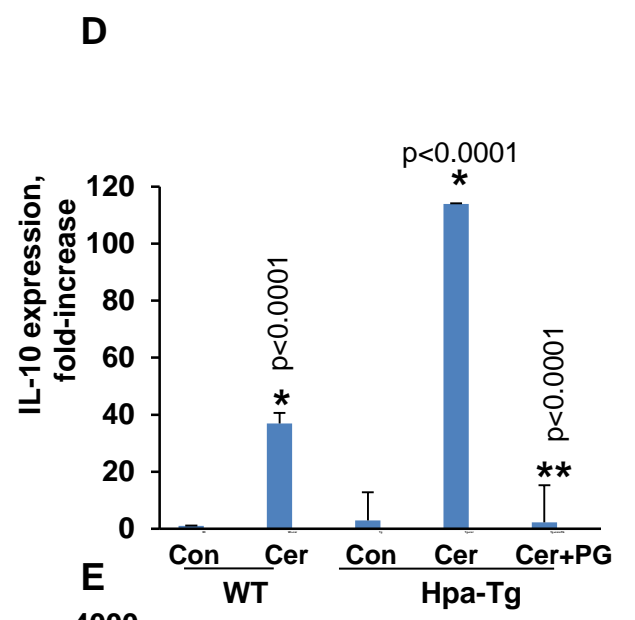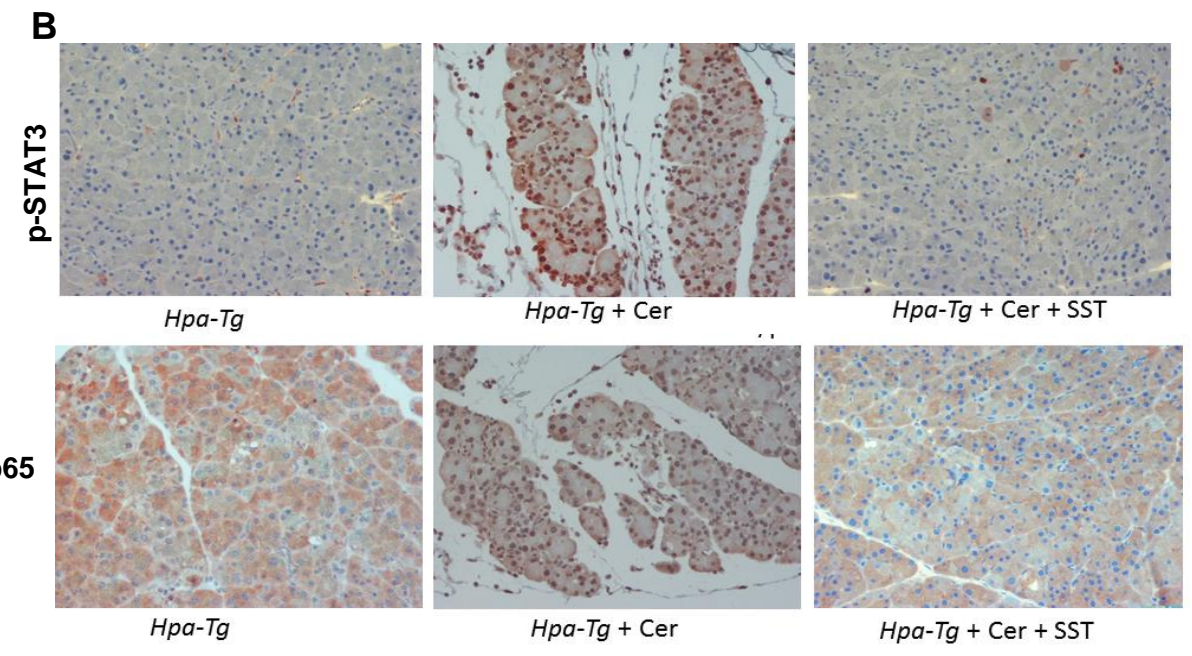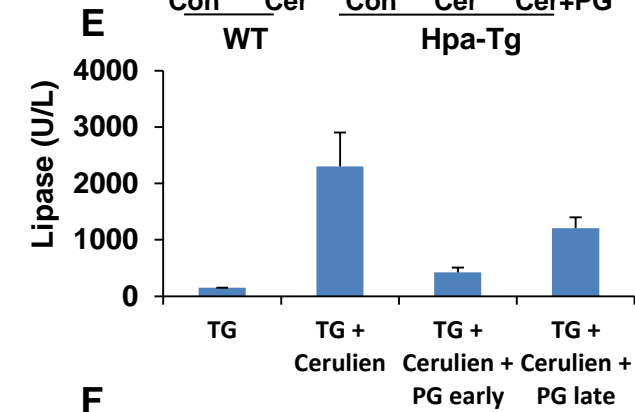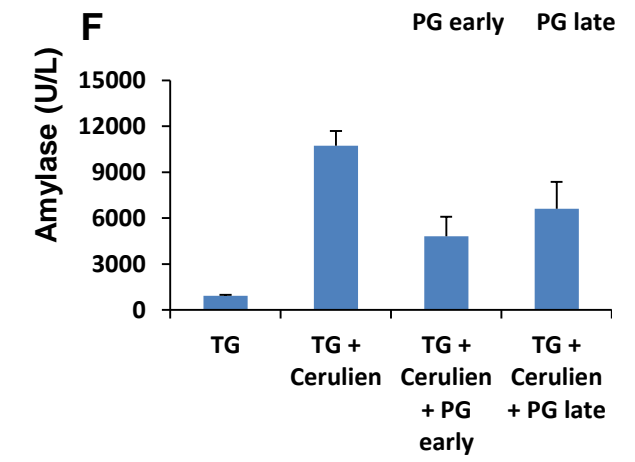

Supplement: 41598_2017_715_MOESM1_ESM.pdf [file 41598_2017_715_MOESM1_ESM.pdf]
